# Supplementary material
Source: PubMed Central journal article supplement (PMC4215902)

## Supporting information

# Aspirin, Diabetes and Islet Amyloid: Reexamination of the Inhibition of Amyloid Formation by Aspirin and Ketoprofen

Ling-Hsien Tu<sup>1</sup>, Harris Noor<sup>1</sup>, Ping Cao<sup>1,2</sup> and Daniel P. Raleigh<sup>1,3\*</sup>

Figure S1: A CD spectrum was recorded for pre-formed amyloid fibrils before the addition of aspirin (Black). Red; spectrum was recorded immediately after the addition of aspirin. Blue; spectrum was recorded 1 hour after the addition of aspirin. Yellow; spectrum was recorded 12 hour after the addition of aspirin. The concentration of IAPP in monomeric units was 16  $\mu\text{M}$ . Aspirin when added was at final concentration of 100  $\mu\text{M}$ . Experiments were conducted at 25  $^{\circ}\text{C}$ , pH 7.4 Tris buffer and 1% HFIP.

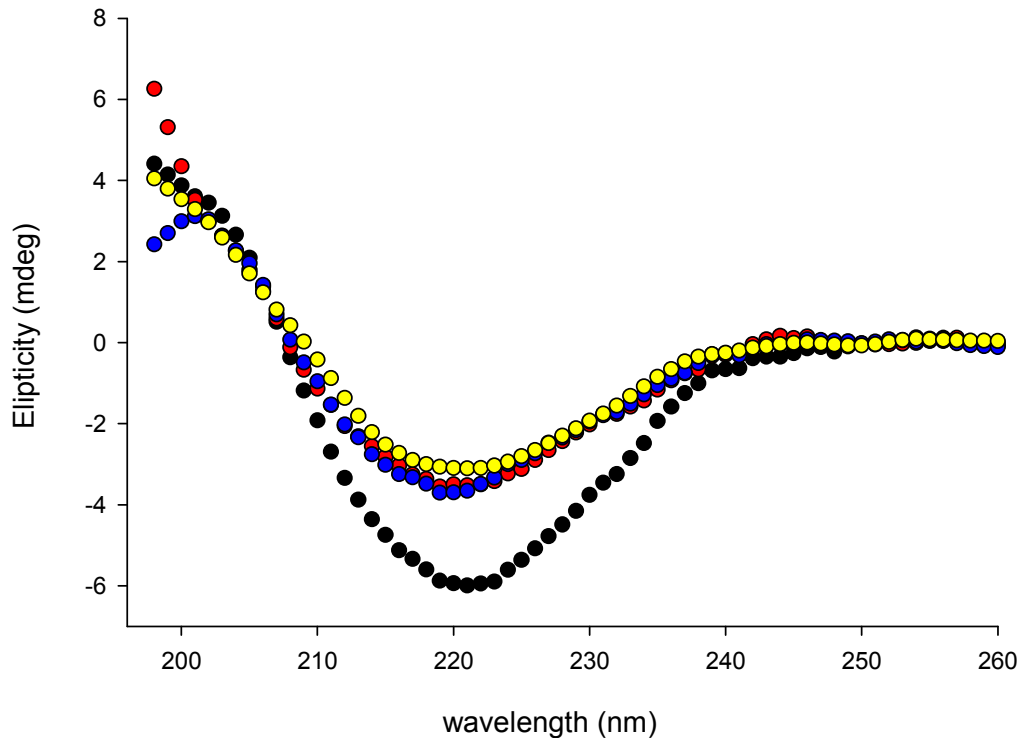

Supplement: cb500162w_si_001.pdf [file cb500162w_si_001.pdf]
